# Supplementary figures and images for: Antihyperglycemic effect of an anthocyanin, cyanidin-3-O-glucoside, is achieved by regulating GLUT-1viathe Wnt/β-catenin-WISP1 signaling pathway
Source: Royal Society of Chemistry journal article supplement (doi:10.1039/d1fo03730g), 2022-01-01

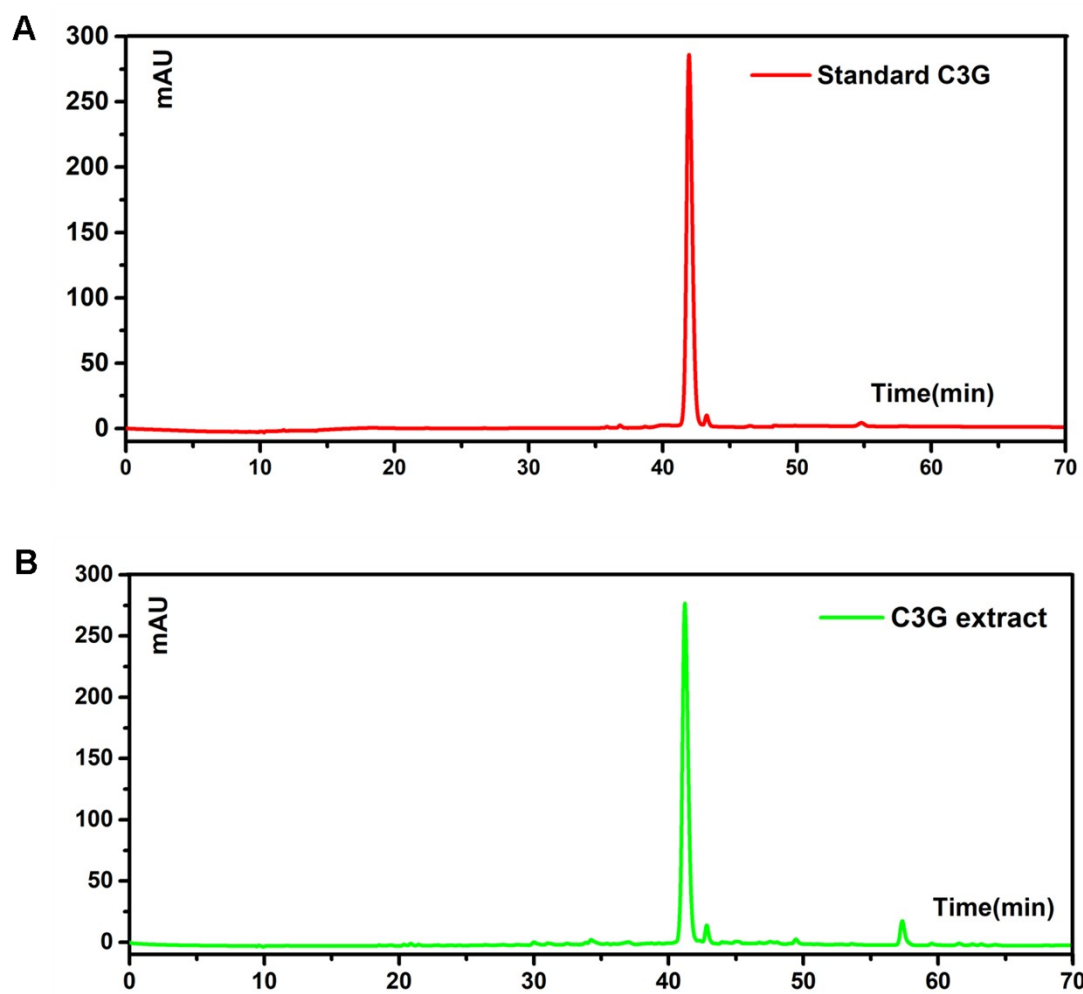

1

2 **Fig. S1** (A) UPLC profiles of C3G standard at 280 nm. (B) UPLC profiles of berry  
3 anthocyanin extract at 280 nm.

4

Supplement: d1fo03730g1.pdf [file d1fo03730g1.pdf]
